# Supplementary material for: The angiosperm radiation played a dual role in the diversification of insects and insect pollinators
Source: PubMed Central journal article supplement (PMC10803743; doi:10.1038/s41467-024-44784-4), 2024-01-22

## Supplementary Information

### *Title*

**The angiosperm radiation played a dual role in the diversification of insects and insect pollinators**

### *Authors*

David Peris<sup>1\*</sup> and Fabien L. Condamine<sup>2</sup>

### *Affiliations*

<sup>1</sup>Institut Botànic de Barcelona (CSIC-Ajuntament de Barcelona), 08038 Barcelona, Spain.

<sup>2</sup>CNRS, Institut des Sciences de l'Evolution de Montpellier, Université de Montpellier, Place Eugène Bataillon, 34095 Montpellier, France.

\* *Corresponding author:* David Peris ([david.peris@ibb.csic.es](mailto:david.peris@ibb.csic.es))

The authors contributed equally.

**Supplementary Figure 1.** Bayesian fossil-based inferences of insect origination (**A**) and extinction (**B**) rates at the family level under the birth-death model with geological epochs as constrained shifts. **C.** The net diversification rates are obtained with the difference between origination and extinction rates (rates below 0 indicate declining diversity). Solid lines indicate mean posterior rates, and the shaded areas show 95% credibility intervals.

**A) Origination rate in insects**

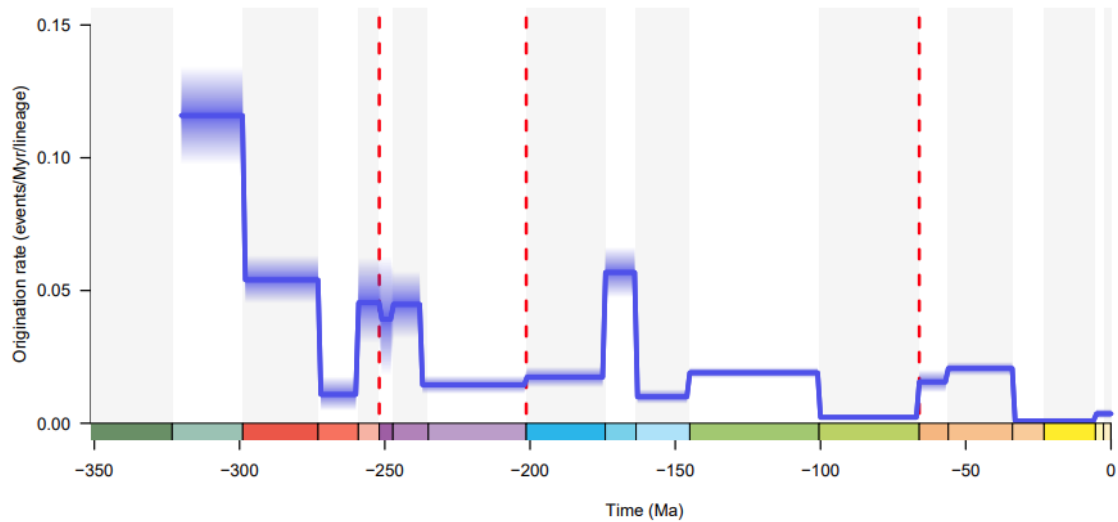

**B) Extinction rate in insects**

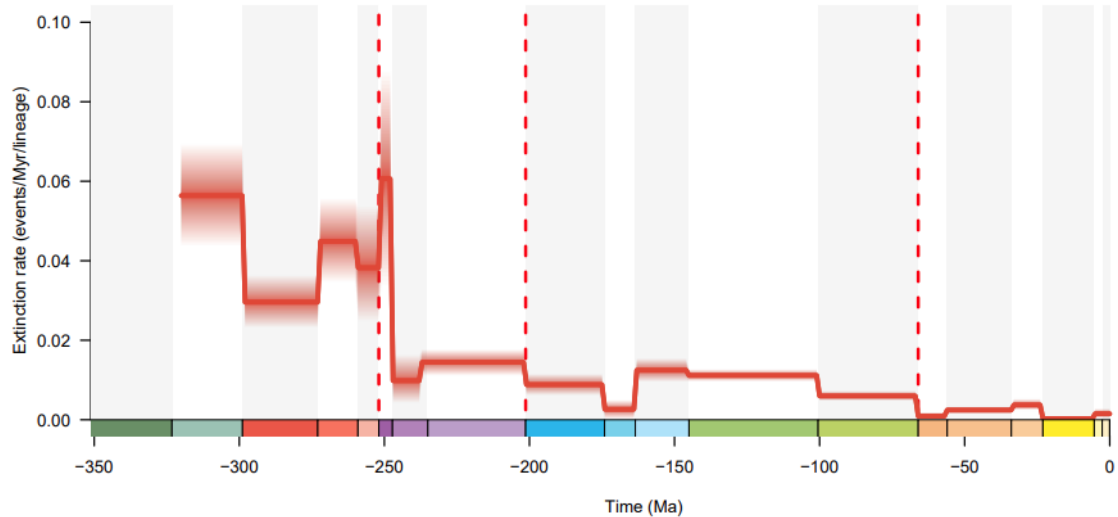

### C) Net diversification rate in insects

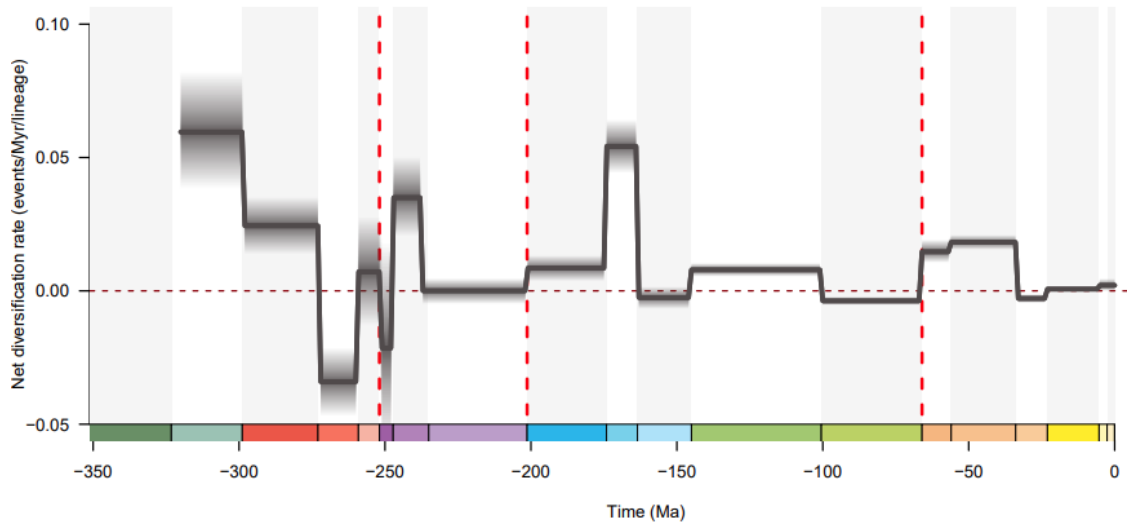

Supplement: 41467_2024_44784_MOESM1_ESM.pdf [file 41467_2024_44784_MOESM1_ESM.pdf]
