# Supplementary material for: The angiosperm radiation played a dual role in the diversification of insects and insect pollinators
Source: PubMed Central journal article supplement (PMC10803743; doi:10.1038/s41467-024-44784-4), 2024-01-22
Supplement: 41467_2024_44784_MOESM3_ESM.pdf [file 41467_2024_44784_MOESM3_ESM.pdf]

**Supplementary Data 1.** Results of the multivariate birth-death model applied to all insect families in three set of analyses. The table reports the mean and median posterior parameter estimates (and 95% credibility interval, CI) for the parameters of the MBD model: baseline speciation ( $\lambda_0$ ), extinction rates ( $\mu_0$ ) and correlation parameters ( $G\lambda$  and  $G\mu$ ) for each of the environmental drivers. Shrinkage weights ( $\omega$ ) greater than 0.5 (highlighted in bold) indicating significant evidence for correlation (positive or negative depending on the respective  $G\lambda$  or  $G\mu$  value).

**Supplementary Data 2.** Results of the multivariate birth-death model applied to pollinator insect families in three set of analyses. The table reports the mean and median posterior parameter estimates (and 95% credibility interval, CI) for the parameters of the MBD model: baseline speciation ( $\lambda_0$ ), extinction rates ( $\mu_0$ ) and correlation parameters ( $G\lambda$  and  $G\mu$ ) for each of the environmental drivers. Shrinkage weights ( $\omega$ ) greater than 0.5 (highlighted in bold) indicating significant evidence for correlation (positive or negative depending on the respective  $G\lambda$  or  $G\mu$  value). Although all environmental variables were significantly correlated with extinction rates ( $\omega > 0.5$ ), the  $G\mu$  correlation parameters had 95% CIs overlapping zero, suggesting a significant effect with a small effect.

**Supplementary Data 3.** Results of the multivariate birth-death model applied to five selected insect orders in two set of analyses. The table reports the mean and median posterior parameter estimates (and 95% credibility interval, CI) for the parameters of the MBD model: baseline speciation ( $\lambda_0$ ), extinction rates ( $\mu_0$ ) and correlation parameters ( $G\lambda$  and  $G\mu$ ) for each of the environmental drivers. Shrinkage weights ( $\omega$ ) greater than 0.5 (highlighted in bold) indicating significant evidence for correlation (positive or negative depending on the respective  $G\lambda$  or  $G\mu$  value). Although all environmental variables were significantly correlated with extinction rates ( $\omega > 0.5$ ), the  $G\mu$  correlation parameters had 95% CIs overlapping zero, suggesting a significant effect with a small effect.
